# Supplementary material for: Measures of lung function and their relationship with advanced glycation end-products
Source: PubMed Central journal article supplement — ERJ Open Res. 2020 Jun 1;6(2):00356-2019. doi: 10.1183/23120541.00356-2019 (PMC7261968; doi:10.1183/23120541.00356-2019), 2020-06-01
Supplement: 00356-2019.SUPPLEMENT.pdf [file 00356-2019.SUPPLEMENT.pdf]

**Supplement Table 1:** Changes in spirometry, diffusing capacity and IOS per 1 SD increase in SAF in non-smokers

|                                |                                                        | <b>Change in lung function measure per 1 SD increase in SAF (95%CI)</b> | <b>p-value</b> |
|--------------------------------|--------------------------------------------------------|-------------------------------------------------------------------------|----------------|
| Spirometry<br>(n=3418)         | FEV <sub>1</sub> (L)                                   | -0.02 (-0.04- -0.01)                                                    | 0.006          |
|                                | FVC (L)                                                | -0.03 (-0.04- -0.01)                                                    | 0.005          |
|                                | FEV <sub>1</sub> /FVC (%)                              | -0.07 (-0.27- 0.13)                                                     | 0.470          |
| Diffusing capacity<br>(n=3242) | D <sub>LCO</sub><br>(mmol/(min kPa))                   | -0.07 (-0.07- -0.06)                                                    | 0.041          |
|                                | D <sub>LCO</sub> /V <sub>A</sub><br>(mmol/(min kPa L)) | -0.01 (-0.01-0.00)                                                      | 0.043          |
| IOS<br>(n=3301)                | R <sub>5</sub> (kPa/(L/s))                             | -0.001 (-0.004-0.002)                                                   | 0.485          |
|                                | R <sub>20</sub> (kPa/(L/s))                            | -0.001 (-0.004-0.001)                                                   | 0.320          |
|                                | R <sub>5</sub> -R <sub>20</sub> (kPa/(L/s))            | 0.000 (-0.001-0.002)                                                    | 0.798          |
|                                | AX (kPa/L)                                             | 0.005 (-0.005-0.015)                                                    | 0.376          |
|                                | f <sub>res</sub> (Hz)                                  | 0.068 (-0.035-0.170)                                                    | 0.195          |
|                                | X <sub>5</sub> (kPa/(L/s))                             | -0.001 (-0.002-0.00)                                                    | 0.130          |

**Adjustments:** Age, height, sex, weight, eGFR, diabetes, log-HbA1c, log- plasma glucose, log-CRP

**Supplement Table 2:** Changes in spirometry, diffusing capacity and IOS per 1 SD increase in AGEs subjects with no known COPD diagnosis

|                                |                                                       | <b>Change in lung function measure per 1 SD increase in SAF (95%CI)</b> | <b>p-value</b> |
|--------------------------------|-------------------------------------------------------|-------------------------------------------------------------------------|----------------|
| Spirometry<br>(n=3892)         | FEV <sub>1</sub> (L)                                  | -0.02 (-0.04- -0.01)                                                    | 0.001          |
|                                | FVC (L)                                               | -0.03 (-0.05- -0.01)                                                    | 0.001          |
|                                | FEV <sub>1</sub> /FVC                                 | 0.00 (-0.002-0.001)                                                     | 0.646          |
| Diffusing capacity<br>(n=3689) | D <sub>LCO</sub><br>(mmol/(min kPa))                  | -0.06 (-0.10- -0.02)                                                    | 0.002          |
|                                | D <sub>LCO</sub> /V <sub>A</sub><br>(mmol(min kPa L)) | -0.009 (-0.015- -0.001)                                                 | <0.001         |
| IOS<br>(n=3757)                | R <sub>5</sub> (kPa/(L/s))                            | 0.00 (-0.003-0.002)                                                     | 0.735          |
|                                | R <sub>20</sub> (kPa/(L/s))                           | -0.001 (-0.003-0.001)                                                   | 0.425          |
|                                | R <sub>5</sub> -R <sub>20</sub> (kPa/(L/s))           | 0.00 (-0.001-0.002)                                                     | 0.501          |
|                                | AX (kPa/L)                                            | 0.007 (-0.002-0.016)                                                    | 0.144          |
|                                | f <sub>res</sub> (Hz)                                 | 0.09 (-0.01-0.19)                                                       | 0.088          |
|                                | X <sub>5</sub> (kPa/(L/s))                            | -0.001 (-0.003-0.000)                                                   | 0.030          |

**Adjustments:** Age, height, sex, weight, smoking status, pack-years, eGFR, diabetes, log-HbA1c, log-plasma glucose, log-CRP
